# Supplementary material for: Synthesis and model simulation of the hexagonal to circular transition of perovskite cesium lead halide nanosheets by rapidly changing the temperature
Source: Royal Society of Chemistry journal article supplement (doi:10.1039/c9ra10312k), 2020-01-01
Supplement: c9ra10312k1.pdf [file c9ra10312k1.pdf]

## Supporting Information

### Synthesis and the Model Simulation of Hexagonal to Circular Varying Perovskite Cesium Lead Halide Nanosheets by Rapidly Changing

#### Temperature

Zhong-Hai Lin,<sup>\*a</sup> Fei Gao,<sup>a</sup> Hong Chen,<sup>a</sup> Jia-Yi Lei,<sup>a</sup> Zhi Yang,<sup>b</sup> Jun-Wei Cai,<sup>a</sup> Ping-Jian Wang<sup>a</sup>  
and Ming-Qiang Wang<sup>b</sup>

<sup>a</sup>Key Laboratory of Intelligent Information Processing in Universities of Shandong, Shandong Business and  
Technology University, Yantai 264005, China. E-mail: zhlin@sdtbu.edu.cn

<sup>b</sup>Electronic Materials Research Laboratory (EMRL), Key Laboratory of Education Ministry; International Center for  
Dielectric Research (ICDR), Xi'an Jiaotong University, Xi'an 710049, China.

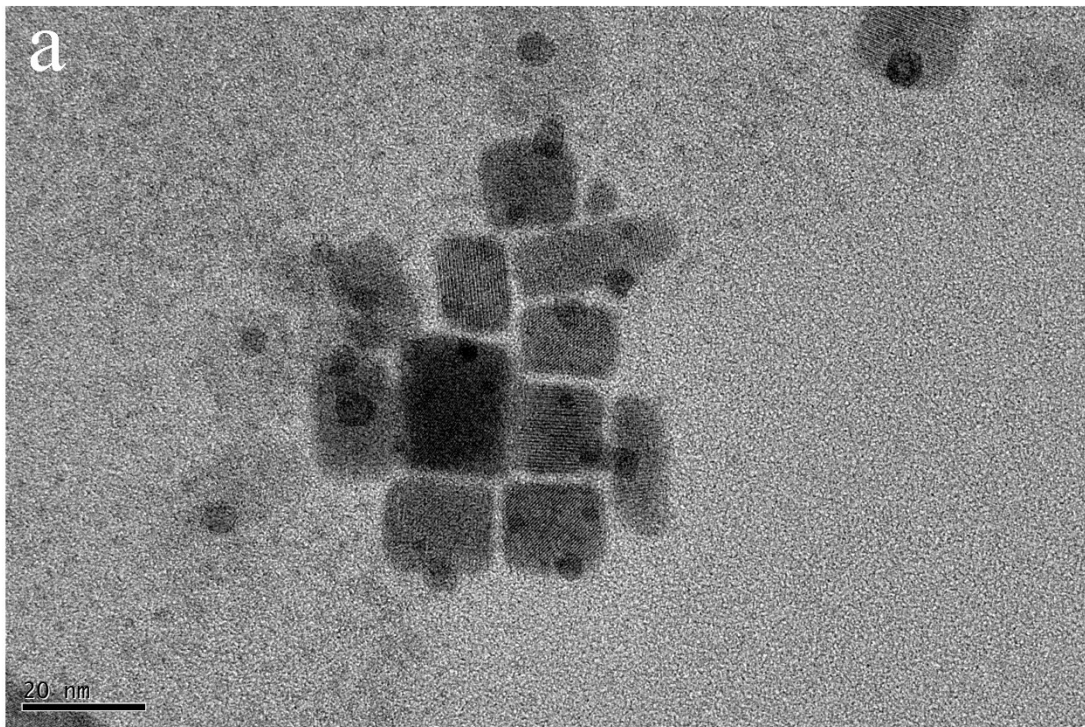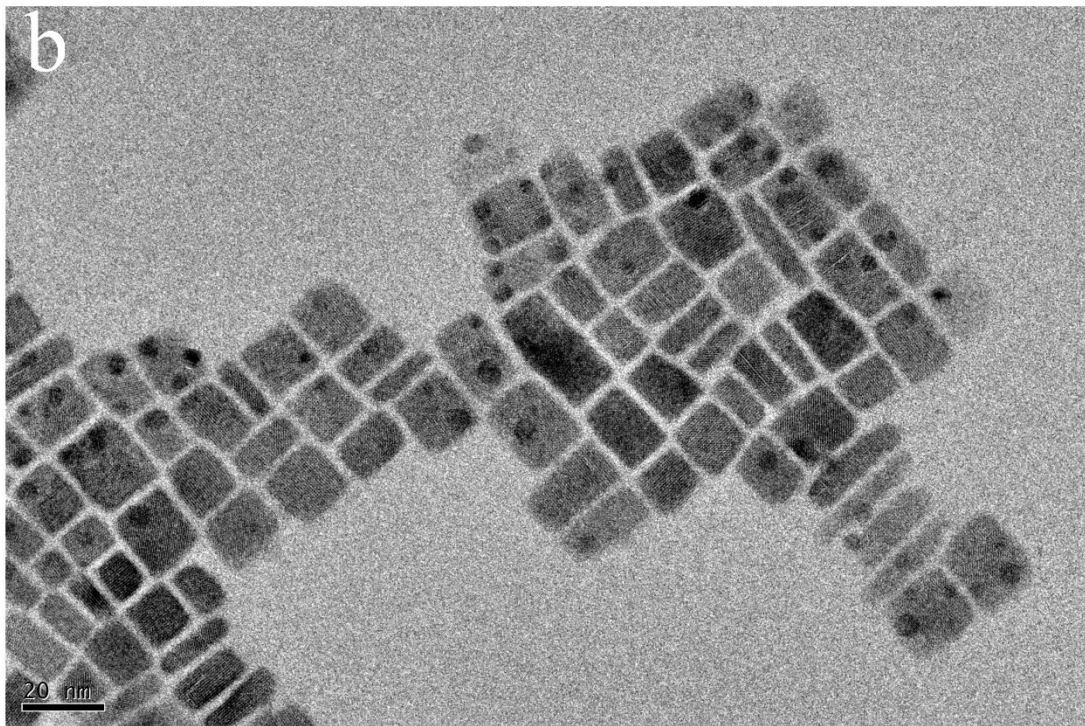

Fig. S1 (a, b) TEM images of the rectangular-like CsPbBr<sub>3</sub> perovskite nanoplates at 150°C.

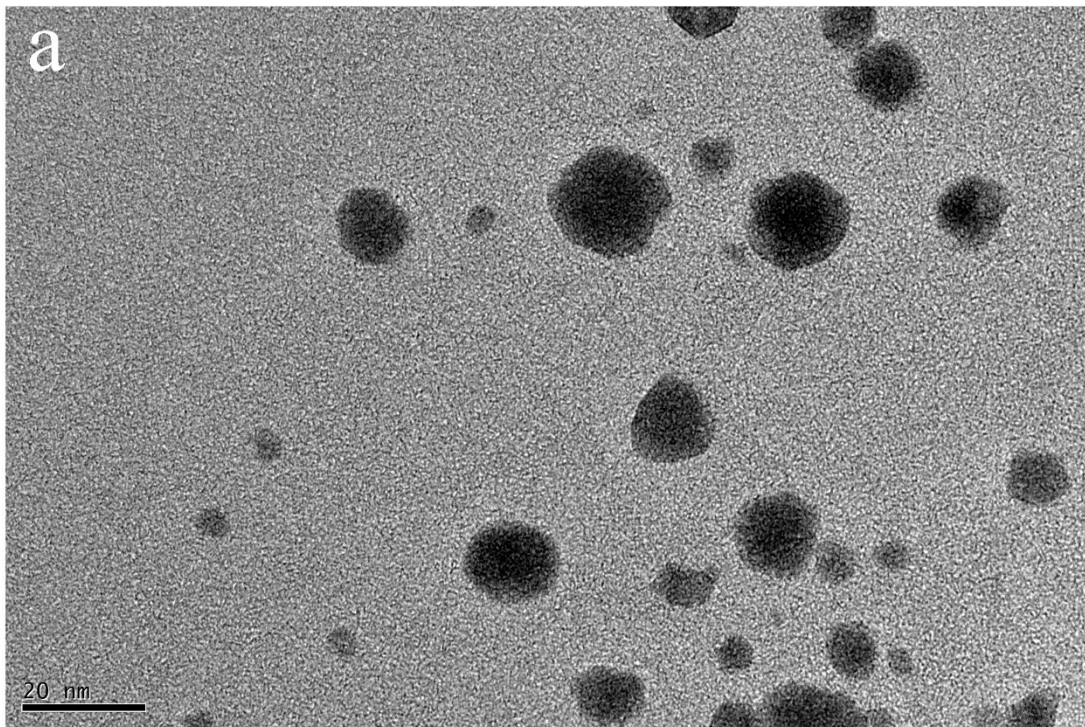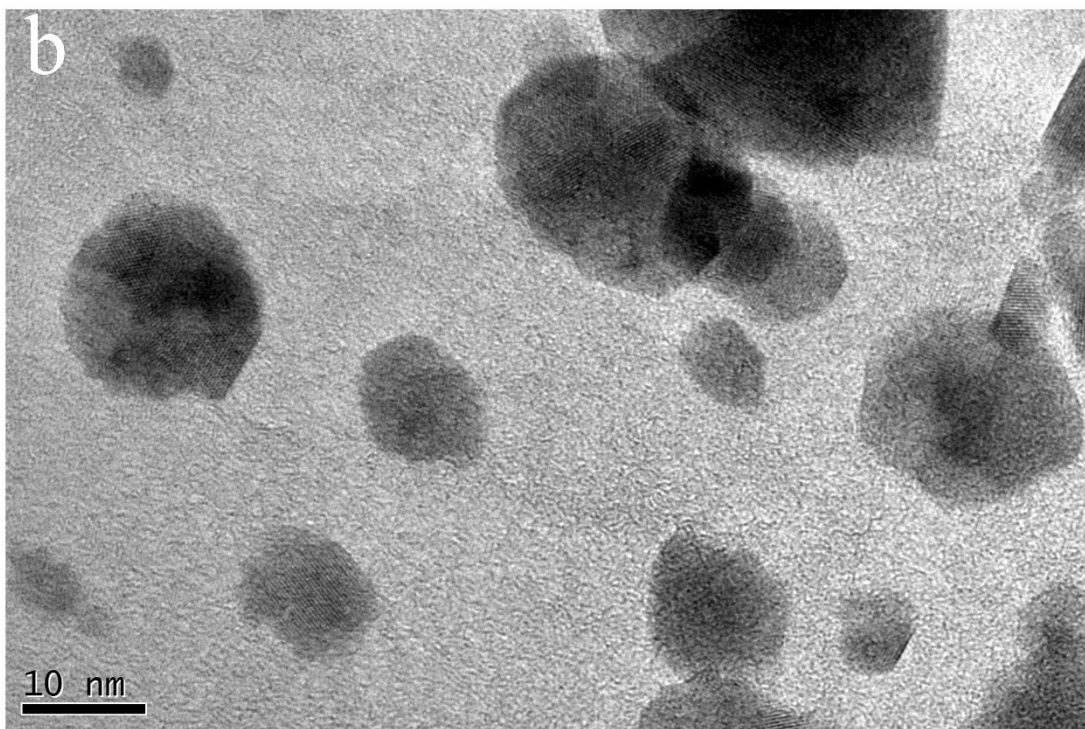

Fig. S2 (a, b) TEM images of the disorganized CsPbBr<sub>3</sub> perovskite nanoplates at 60°C.
